Working paper

1  
2  
3  
4  
5  
6  
7  
8  
9  
10  
11  
12  
13  
14  
15  
16  
17  
18  
19  
20  
21

Running head: Branch lengths in phylogenomics

**Phylogenetic signal is associated with the degree of variation in root-to-tip distances**

Mezzalina Vankan<sup>a</sup>, Simon Y.W. Ho<sup>b</sup>, Carolina Pardo-Diaz<sup>c</sup>, David A. Duchêne<sup>a,\*</sup>

<sup>a</sup>*Research School of Biology, Australian National University, ACT 2601, Australia*

<sup>b</sup>*School of Life and Environmental Sciences, University of Sydney, Camperdown, NSW 2006, Australia*

<sup>c</sup>*Biology Program, Universidad del Rosario, Carrera 24 No.63C-69, Bogotá, 111221 Colombia*

\*Corresponding author

David A. Duchêne

Research School of Biology

Robertson Building, 46

Australian National University

Canberra, ACT 2601

Australia

Telephone: +61 4 12026379

Email: david.duchene@anu.edu.au

22 *Abstract.*—The phylogenetic information contained in sequence data is partly determined by the  
23 overall rate of nucleotide substitution in the genomic region in question. However, phylogenetic  
24 signal is affected by various other factors, such as heterogeneity in substitution rates across  
25 lineages. These factors might be able to predict the phylogenetic accuracy of any given gene in a  
26 data set. We examined the association between the accuracy of phylogenetic inference across  
27 genes and several characteristics of branch lengths in phylogenomic data. In a large number of  
28 published data sets, we found that the accuracy of phylogenetic inference from genes was  
29 consistently associated with their mean statistical branch support and variation in their gene tree  
30 root-to-tip distances, but not with tree length and stemminess. Therefore, a signal of constant  
31 evolutionary rates across lineages appears to be beneficial for phylogenetic inference. Identifying  
32 the causes of variation in root-to-tip lengths in gene trees also offers a potential way forward to  
33 increase congruence in the signal across genes and improve estimates of species trees from  
34 phylogenomic data sets.

35

### 36 **Keywords**

37 Phylogenomics, substitution rate, nucleotide substitution model, branch support, data filtering

38           The phylogenetic signal in a molecular sequence alignment is influenced by a number of  
39 factors, including the substitution rate at which the sequences have evolved relative to the  
40 timescale of the process. In principle, the amount of information in the sequence alignment  
41 depends on the overall substitution rate of the gene (Goldman 1998; Xia et al. 2003; Townsend  
42 and Leuenberger 2011; Klopstein et al. 2017; Steel and Leuenberger 2017). However, the  
43 substitution rate might be a poor predictor of the accuracy of the inferred tree topology (Aguileta  
44 et al. 2008). This is because the phylogenetic signal in a gene can be obscured by various forms  
45 of heterogeneity, such as variation in rates across sites (Su and Townsend 2015; Dornburg et al.  
46 2019). Substantial rate heterogeneity can also be found across branches (Bromham and Penny  
47 2003), but there is still a limited understanding of the association between this form of rate  
48 variation and the topological signal in phylogenomic data sets.

49           Substitution rates can vary across genes and across lineages because of differences in  
50 selective pressures or limits on mutation rates (Gillespie 1991; Gaut et al. 2011). The factors that  
51 drive rate variation across genes and lineages can interact in what are known as “residual effects”  
52 (Gillespie 1991), potentially creating complex patterns of substitution rates across genes (Ho  
53 2014; Duchêne and Ho 2015). Genes can also differ in their evolutionary histories, including  
54 their coalescence times, due to recombination breaking the linkage between sections of the  
55 genome (Maddison 1997). In addition to varying in their signals of rates and times, estimates of  
56 substitution rates in individual genes can be misled by a number of methodological factors,  
57 including model misspecification (Sullivan and Joyce 2005) and errors in alignment, orthology  
58 assignment, or sequencing (Wilkinson 1996; Sanderson and Shaffer 2002).

59           Any differences in evolutionary rates across genes will be reflected in the estimates of  
60 gene tree branch lengths. In statistical phylogenetic inference, branch lengths are closely linked

61 to the estimate of tree topology. For example, long branches can have negative impacts on  
62 phylogenetic accuracy because of their tendency to be grouped together (“long-branch  
63 attraction”; Anderson & Swofford 2004). Even a single long branch can drastically change the  
64 phylogenetic signal in the data (Su and Townsend 2015). Meanwhile, low substitution rates can  
65 lead to a lack of phylogenetic information and even to a greater amount of phylogenetic error  
66 than in sequences that have evolved with very high substitution rates (Yang 1998). Although  
67 most research has focused on the differences in overall substitution rates across genes, the  
68 variation in the signal of rates across lineages is likely to provide a more nuanced and accurate  
69 predictor of the topological signal across the genome.

70         One potential predictor of phylogenetic accuracy is the degree of variation in the inferred  
71 distances from the root to each of the tips in a given gene tree. If substitution rates have been  
72 constant across lineages, the root-to-tip distances are expected to be proportional to time.  
73 Therefore, root-to-tip distances should all be identical in a data set where the samples come from  
74 the present and the sequences have evolved under a strict molecular clock. In theory, it is  
75 unlikely that any poor estimation in branch lengths will produce identical root-to-tip distances.  
76 Variation in root-to-tip distances might be caused by variation in rates across lineages, but  
77 critically, it is also diagnostic of the presence of factors causing inaccurate estimates of branch  
78 lengths.

79         Variation in root-to-tip distances will not be informative in cases where low information  
80 content is due to fast diversification events (over short time-periods) or where multiple lineages  
81 have changed in evolutionary rate simultaneously (an “epoch” model of rate variation). An  
82 alternative predictor of phylogenetic accuracy is the ratio of the lengths of internal branches to  
83 terminal branches, also known as stemminess (Fiala and Sokal 1985). Low stemminess is

84 typically associated with a poor topological signal (e.g., Penny et al. 2001; Duchêne et al.  
85 2018c), yet it is frequently observed in phylogenetic trees (e.g., Phillimore & Price 2008). Some  
86 explanations for low stemminess include rapid diversification events (McPeck 2008), sparse  
87 taxon sampling (Penny et al. 2001; Cusimano and Renner 2010), underparameterization of the  
88 substitution model (Revell et al. 2005), and deep gene coalescences relative to species  
89 divergence times (Maddison 1997; Degnan and Rosenberg 2009).

90         Testing the link between characteristics of branch lengths and estimates of tree topology  
91 across genes has potential benefits for the design of phylogenomic studies. One approach to  
92 carrying out a phylogenomic study is to employ a criterion to select genes for analysis, a practice  
93 known as “data filtering” or “gene shopping” (Molloy and Warnow 2018). Some of the criteria  
94 that have previously been used for data filtering include phylogenetic branch supports (Blom et  
95 al. 2016), the amount of missing data (Molloy and Warnow 2018), measures of substitution  
96 model adequacy (Duchêne et al. 2018c; Richards et al. 2018), and base composition (Dávalos  
97 and Perkins 2008; Martijn et al. 2018). It not clear which of these criteria is the most effective  
98 (Molloy and Warnow 2018), but it is likely that no single criterion is universally applicable  
99 (Reddy et al. 2017). Nonetheless, branch lengths provide an estimate of the amount of genetic  
100 change that is captured in a data set, so it is reasonable to surmise that they present a general  
101 predictor of the accuracy of estimates of tree topology (Klopfstein et al. 2017).

102         In this study, we explore the association between three branch-length metrics and  
103 estimates of tree topology across a collection of 34 phylogenomic data sets. When examining  
104 individual data sets, we find that the tree length is not the best predictor of phylogenetic  
105 information content among genes. Across the 34 data sets, we observe an association between  
106 the performance of phylogenetic inference and the variation in root-to-tip distances.

107 Phylogenomic studies are likely to benefit from considering the heterogeneity in rates across  
108 lineages for describing the signal of tree topology across loci.

109

## 110 **MATERIALS AND METHODS**

111 We collected a set of 34 phylogenomic data sets covering a wide range of taxa and data  
112 types (Table 1), including intron and exon regions, ultraconserved elements, and anchor-enriched  
113 regions. The original studies varied widely in their treatment of these data sets. For instance,  
114 some studies considered the trees from each of the codon positions of protein-coding genes  
115 independently. We followed the data treatments used in the original studies so that our analyses  
116 would reflect the approaches that have been used in practice.

117 For each data set, we inferred the phylogeny using IQ-Tree (Nguyen et al. 2015) with the  
118 best-fitting substitution model from the GTR+ $\Gamma$  family. We then identified a set of gene trees  
119 from each data set that contained the same set of taxa. The taxon set was selected to maximize  
120 the product of the number of taxa and the number of genes, while maintaining full occupancy of  
121 the data matrix (for details see [github.com/duchene/branch\\_length\\_influence\\_topology](https://github.com/duchene/branch_length_influence_topology)).

122 We calculated three test statistics that described the branch-length signal in each gene  
123 tree. These statistics included: (i) the coefficient of variation (CoV) in distances from the  
124 midpoint-root to the tips, which provides a measure of rate heterogeneity across lineages; (ii) tree  
125 length calculated as the sum of all branch lengths; and (iii) tree stemminess (Fiala and Sokal  
126 1985). In addition, we calculated for each gene the mean of the statistical support across  
127 branches, using the Shimodaira-Hasegawa-like approximate likelihood-ratio test (aLRT;  
128 described in Anisimova and Gascuel 2006).

129           We assessed whether the four branch statistics could explain two different measures of  
130 the accuracy of tree topology estimates. The first measure was the topological distance from the  
131 species tree as estimated using a multispecies coalescent analysis in ASTRAL-III (Zhang et al.  
132 2018) of the complete set of genes for the corresponding study. This evaluates the concordance  
133 between the phylogenetic signal in each gene tree and the underlying species history. The second  
134 measure of accuracy was the mean topological distance between the gene tree and all other gene  
135 trees from the corresponding data set. This evaluates the concordance of the signal in each gene  
136 tree with the remainder of the phylogenetic signals in the genome. All topological distances were  
137 calculated using the Robinson-Foulds topological distance (Robinson and Foulds 1981; Penny  
138 and Hendy 1985).

139           We used multiple linear regression to test whether the two measures of topological  
140 accuracy are explained by the four branch statistics. For each of the two response variables  
141 (topological distance of the gene tree to the species tree and mean topological distance to other  
142 gene trees), we first tested a model that included the complete data set of the genes from across  
143 the 34 studies ( $N = 36,075$ ). We included the four branch statistics as explanatory variables in the  
144 regression models.

145           Since we aimed to identify the correlates of phylogenetic signal within each study, we  
146 attempted to account for the differences across studies in their results and their sample size. We  
147 included a random factor in each regression model that indicated the source study of each gene,  
148 this way accounting for the differences in patterns that might occur among studies. In this large  
149 model, we corrected tree length for the number of taxa by dividing it by the number of branches  
150 in the study (leading to the mean of branch lengths) to make the values fall on a similar scale  
151 across studies. We also explored the model when weighting each gene by the number of taxa in

152 its source study, such that studies with a greater number of genes have a greater contribution to  
153 the model.

154 To focus further on the results within studies, we performed a second set of regression  
155 models where each study was examined independently. For each study, we tested whether our  
156 two response variables were explained by our four branch statistics. Therefore, this second set of  
157 analyses included two regression tests for each of the 34 studies that we examined. Tree length  
158 was left uncorrected for the number of branches in the regression models for individual studies.

159

## 160 **RESULTS**

161 The regression analyses that included the 34 complete data sets showed that some of our  
162 explanatory variables had a significant association with both measures of topological accuracy  
163 (topological distance to the species tree and topological distance to other gene trees; Fig. 1).  
164 Specifically, we found that topological accuracy has a positive association with the CoV in root-  
165 to-tip distances, and a negative association with mean aLRT branch support (Fig. 1). Mean aLRT  
166 branch support had the strongest association with both topological distance to the species tree  
167 and to other gene trees. Strikingly, we find limited evidence for an association between  
168 topological accuracy and tree length or stemminess. Results were comparable across regression  
169 models in which samples (genes) were weighted by number of branches or by number of taxa in  
170 respective studies (Supplementary Fig. S1).

171 The regression models that explored individual data sets supported the results from our  
172 larger regression models. Only a small minority of data sets showed an effect opposite to those  
173 observed for the CoV in root-to-tip distances and branch support. Meanwhile, there was  
174 substantial variation in terms of the association between topological accuracy and tree length or



175 stemminess. As expected, the results of individual regression analyses showed greater  $t$ -statistics  
 176 (smaller  $P$ -values) for data sets with large numbers of genes than for data sets with few genes.  
 177 The  $t$ -statistics were comparable among regression models with each of the two measures of  
 178 topological accuracy (Supplementary Fig. S2).

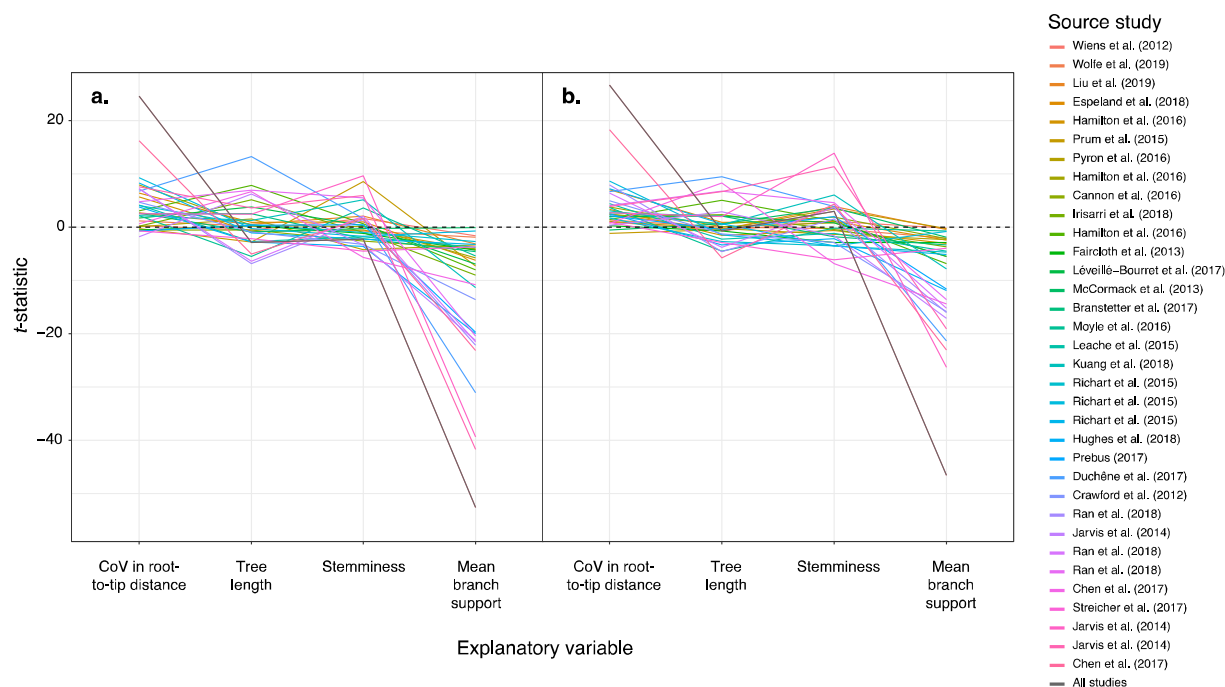

179  
 180 **Figure 1.** Summary  $t$ -statistic for multiple regression tests of the association between five  
 181 explanatory variables describing branch lengths and each of two response variables: (a)  
 182 topological distance between gene trees and the inferred species tree; and (b) mean distance from  
 183 each gene tree to all other gene trees. The legend lists the source studies in ascending order of  
 184 number of genes in the data set (see Table 1 for details).  
 185

## 186 DISCUSSION

187 Our analyses of a collection of phylogenomic data sets have shown that low variation in  
 188 root-to-tip distances and strong branch support in gene trees have a strong association with  
 189 phylogenetic accuracy. Strikingly, tree length is a poor predictor of the accuracy of topological  
 190 inference across gene trees. This is surprising because tree length is proportional to the overall

191 substitution rate in a gene (Yang 1998), and is a prominent form of variation in the phylogenetic  
192 information across gene trees (Duchêne et al. 2020). These results are consistent with recent  
193 work that emphasized the importance of heterogeneity in the data rather than the overall  
194 substitution rate as an indicator of phylogenetic accuracy (Su and Townsend 2015; Dornburg et  
195 al. 2019).

196 Phylogenomic analysis can potentially be improved by focusing analyses and  
197 interpretation of results according to loci with particular patterns of rate variation across lineages.  
198 A formal method of identifying genes with constant rates across lineages is to compare a model  
199 of rate constancy versus one allowing rate variation (Felsenstein 1981). However, not all forms  
200 of rate variation across lineages are problematic for phylogenetics. One approach that might  
201 benefit phylogenomic studies is to identify the loci that have extreme patterns of rate variation  
202 among lineages and exclude them from analyses. Loci can then be retained for analysis when  
203 they contain patterns of rate variation across lineages that are mild and recurrent across multiple  
204 regions in the genome. Methods of describing the diversity of patterns of rate variation can be  
205 useful for this purpose (Duchêne et al. 2014).

206 Some of the extreme forms of variation in root-to-tip distances that lead to poor  
207 phylogenetic accuracy might be unrelated to variation in evolutionary rates across lineages. For  
208 example, sequence evolution might be heterogeneous across the tree, with variation in base  
209 composition or in transition probabilities among nucleotides (e.g., Dávalos & Perkins 2008;  
210 Foster *et al.* 2009; Martijn *et al.* 2018). Therefore, methods of assessing model adequacy are  
211 likely to be useful complementary diagnostics for improving the accuracy of topological  
212 inferences (Brown and EIDabaje 2009; Doyle et al. 2015; Höhna et al. 2017; Duchêne et al.  
213 2018b, 2018c).

214 Variation in root-to-tip distances might also be an artefact of data preparation, rather than  
215 model performance. If model performance was a primary driver of phylogenetic accuracy, then  
216 we expect poor accuracy to be strongly associated with low stemminess (Revell et al. 2005). One  
217 wide-ranging solution to errors in data preparation is to identify and remove any taxa that have a  
218 highly variable position in a each given gene tree, also known as “rogue taxa” (Aberer et al.  
219 2013) or which sit on extremely long terminal branches (Mai and Mirarab 2018). Similarly,  
220 phylogenomic studies of the relationships at a specific branch of the tree can benefit from  
221 identifying genes with a highly decisive signal (Fong et al. 2012) or those with the signal of a  
222 long branch separating the taxa in question (Chen et al. 2015). Given that multiple factors can  
223 affect branch-length estimates, using a mixture of methods that identify possibly misleading  
224 genes as well as lineages is likely to be effective for data filtering in phylogenomics.

225 We found that branch support strongly explains our measures of topological accuracy.  
226 Previous work has shown that gene trees with high bootstrap branch supports are associated with  
227 greater nodal support values in species-tree inferences (Blom et al. 2016). The branch-support  
228 metric used in our analyses, SH-aLRT support (Anisimova and Gascuel 2006), reflects the  
229 consistency in the signal of a given branch across the sites in the data set. High values indicate  
230 that there is a concordant signal across a large number of the informative sites. Low values can  
231 occur in genes that have few informative sites, have high degrees of rate heterogeneity across  
232 sites, or that are affected by saturation or intragenic recombination. Therefore, mean branch  
233 support is likely to provide another useful diagnostic of phylogenetic accuracy across genes.  
234 However, the relative performance of different branch-support metrics in indicating phylogenetic  
235 accuracy is yet to be explored (e.g., Lemoine et al. 2018; Minh et al. 2018).

236           The results of our study offer a basis for developing a framework for phylogenomics that  
237 prioritizes the inclusion of genes with a signal of limited variation in root-to-tip distances and a  
238 signal of topology that is highly concordant across sites. Our results suggest that the overall  
239 substitution rate is of limited importance as long as the evolutionary process has been  
240 homogeneous across lineages from the root of the process to the present. Potential avenues for  
241 future research include exploring the accuracy in the signal of particular types of deviation from  
242 a constant evolutionary rate across lineages, exploring the importance of model adequacy when  
243 estimating branch lengths, or comparing the performance of various metrics of branch support  
244 for predicting phylogenetic accuracy. Further examination of the correlates of reliable  
245 phylogenetic signal will be useful for selecting genes for phylogenomic analyses.

246

#### 247 **ACKNOWLEDGEMENTS**

248 This work was supported by funding from the Australian Research Council to S.Y.W.H. (grant  
249 FT160100167) and to D.A.D. (grant DE190100544).

250

#### 251 **LITERATURE CITED**

252 Aberer A.J., Krompass D., Stamatakis A. 2013. Pruning rogue taxa improves phylogenetic  
253 accuracy: An efficient algorithm and webservice. *Syst. Biol.* 62:162–166.

254 Aguilera G., Marthey S., Chiapello H., Lebrun M.-H., Rodolphe F., Fournier E., Gendrault-  
255 Jacquemard A., Giraud T. 2008. Assessing the performance of single-copy genes for  
256 recovering robust phylogenies. *Syst. Biol.* 57:613–627.

257 Anderson F.E., Swofford D.L. 2004. Should we be worried about long-branch attraction in real  
258 data sets? Investigations using metazoan 18S rDNA. *Mol. Phylogenet. Evol.* 33:440–451.

- 259 Anisimova M., Gascuel O. 2006. Approximate likelihood-ratio test for branches: A fast,  
260 accurate, and powerful alternative. *Syst. Biol.* 55:539–552.
- 261 Blom M.P.K., Bragg J.G., Potter S., Moritz C. 2016. Accounting for uncertainty in gene tree  
262 estimation: Summary-coalescent species tree inference in a challenging radiation of  
263 Australian lizards. *Syst. Biol.* 66:352–366.
- 264 Branstetter M.G., Danforth B.N., Pitts J.P., Faircloth B.C., Ward P.S., Buffington M.L., Gates  
265 M.W., Kula R.R., Brady S.G. 2017. Phylogenomic insights into the evolution of stinging  
266 wasps and the origins of ants and bees. *Curr. Biol.* 27:1019–1025.
- 267 Bromham L., Penny D. 2003. The modern molecular clock. *Nat. Rev. Genet.* 4:216–224.
- 268 Brown J.M., ElDabaje R. 2009. PuMA: Bayesian analysis of partitioned (and unpartitioned)  
269 model adequacy. *Bioinformatics.* 25:537–538.
- 270 Chen M.-Y., Liang D., Zhang P. 2015. Selecting question-specific genes to reduce incongruence  
271 in phylogenomics: A case study of jawed vertebrate backbone phylogeny. *Syst. Biol.*  
272 64:1104–1120.
- 273 Chen M.-Y., Liang D., Zhang P. 2017. Phylogenomic resolution of the phylogeny of  
274 laurasiatherian mammals: Exploring phylogenetic signals within coding and noncoding  
275 sequences. *Genome Biol. Evol.* 9:1998–2012.
- 276 Crawford N.G., Faircloth B.C., McCormack J.E., Brumfield R.T., Winker K., Glenn T.C. 2012.  
277 More than 1000 ultraconserved elements provide evidence that turtles are the sister group of  
278 archosaurs. *Biol. Lett.* 8:783–786.
- 279 Cusimano N., Renner S.S. 2010. Slowdowns in diversification rates from real phylogenies may  
280 not be real. *Syst. Biol.* 59:458–464.
- 281 Dávalos L.M., Perkins S.L. 2008. Saturation and base composition bias explain phylogenomic

- 282 conflict in *Plasmodium*. *Genomics*. 91:433–442.
- 283 Degnan J.H., Rosenberg N.A. 2009. Gene tree discordance, phylogenetic inference and the  
284 multispecies coalescent. *Trends Ecol. Evol.* 24:332–340.
- 285 Dornburg A., Su Z., Townsend J.P. 2019. Optimal rates for phylogenetic inference and  
286 experimental design in the era of genome-scale data sets. *Syst. Biol.* 68:145–156.
- 287 Doyle V.P., Young R.E., Naylor G.J.P., Brown J.M. 2015. Can we identify genes with increased  
288 phylogenetic reliability? *Syst. Biol.* 64:824–837.
- 289 Duchêne D.A., Bragg J.G., Duchêne S., Neaves L.E., Potter S., Moritz C., Johnson R.N., Ho  
290 S.Y.W., Eldridge M.D.B. 2018a. Analysis of phylogenomic tree space resolves  
291 relationships among marsupial families. *Syst. Biol.* 67:400–412.
- 292 Duchêne D.A. DA, Duchêne S., Ho S.Y.W.S. 2018b. PhyloMAd: Efficient assessment of  
293 phylogenomic model adequacy. *Bioinformatics*. 34:2300–2301.
- 294 Duchêne D.A., Duchêne S., Ho S.Y.W. 2018c. Differences in performance among test statistics  
295 for assessing phylogenomic model adequacy. *Genome Biol. Evol.* 10:1375–1388.
- 296 Duchêne D.A., Tong K.J., Foster C.S.P., Duchêne S., Lanfear R., Ho S.Y.W. 2020. Linking  
297 branch lengths across sets of loci provides the highest statistical support for phylogenetic  
298 inference. *Mol. Biol. Evol.*:doi:10.1093/molbev/msz291.
- 299 Duchêne S., Ho S.Y.W. 2015. Mammalian genome evolution is governed by multiple  
300 pacemakers. *Bioinformatics*. 31:2061–2065.
- 301 Duchêne S., Molak M., Ho S.Y.W. 2014. ClockstaR: Choosing the number of relaxed-clock  
302 models in molecular phylogenetic analysis. *Bioinformatics*. 30:1017–1019.
- 303 Espeland M., Breinholt J., Willmott K.R., Warren A.D., Vila R., Toussaint E.F.A., Maunsell  
304 S.C., Aduse-Poku K., Talavera G., Eastwood R. 2018. A comprehensive and dated

- 305 phylogenomic analysis of butterflies. *Curr. Biol.* 28:770–778.
- 306 Faircloth B.C., Sorenson L., Santini F., Alfaro M.E. 2013. A phylogenomic perspective on the  
307 radiation of ray-finned fishes based upon targeted sequencing of ultraconserved elements  
308 (UCEs). *PLOS One.* 8:e65923.
- 309 Felsenstein J. 1981. Evolutionary trees from DNA sequences: a maximum likelihood approach.  
310 *J. Mol. Evol.* 17:368–376.
- 311 Fiala K.L., Sokal R.R. 1985. Factors determining the accuracy of cladogram estimation:  
312 evaluation using computer simulation. *Evolution.* 39:609–622.
- 313 Fong J.J., Brown J.M., Fujita M.K., Boussau B. 2012. A phylogenomic approach to vertebrate  
314 phylogeny supports a turtle-archosaur affinity and a possible paraphyletic Lissamphibia.  
315 *PLOS One.* 7:e48990.
- 316 Foster P.G., Cox C.J., Embley T.M. 2009. The primary divisions of life: a phylogenomic  
317 approach employing composition-heterogeneous methods. *Philos. Trans. R. Soc. Lond. B.*  
318 *Biol. Sci.* 364:2197–2207.
- 319 Gaut B., Yang L., Takuno S., Eguiarte L.E. 2011. The patterns and causes of variation in plant  
320 nucleotide substitution rates. *Annu. Rev. Ecol. Evol. Syst.* 42:245–266.
- 321 Gillespie J. 1991. *The causes of molecular evolution.* New York: Oxford University Press.
- 322 Goldman N. 1998. Phylogenetic information and experimental design in molecular systematics.  
323 *Proc. R. Soc. B Biol. Sci.* 265:1779–1786.
- 324 Hamilton C.A., Lemmon A.R., Lemmon E.M., Bond J.E. 2016. Expanding anchored hybrid  
325 enrichment to resolve both deep and shallow relationships within the spider tree of life.  
326 *BMC Evol. Biol.* 16:212.
- 327 Ho S.Y.W. 2014. The changing face of the molecular evolutionary clock. *Trends Ecol. Evol.*

328 29:496–503.

329 Höhna S., Coghill L.M., Mount G.G., Thomson R.C., Brown J.M. 2017. P3: Phylogenetic  
330 posterior prediction in RevBayes. *Mol. Biol. Evol.* 35:1028–1034.

331 Hughes L.C., Ortí G., Huang Y., Sun Y., Baldwin C.C., Thompson A.W., Arcila D., Betancur R.,  
332 Li C., Becker L., Bellora N., Zhao X., Li X., Wang M., Fang C., Xie B., Zhou Z., Huang  
333 H., Chen S., Venkatesh B., Shi Q. 2018. Comprehensive phylogeny of ray-finned fishes  
334 (Actinopterygii) based on transcriptomic and genomic data. *Proc. Natl. Acad. Sci. U. S. A.*  
335 115:6249–6254.

336 Irisarri I., Singh P., Koblmüller S., Torres-Dowdall J., Henning F., Franchini P., Fischer C.,  
337 Lemmon A.R., Lemmon E.M., Thallinger G.G., Sturmbauer C., Meyer A. 2018.  
338 Phylogenomics uncovers early hybridization and adaptive loci shaping the radiation of Lake  
339 Tanganyika cichlid fishes. *Nat. Commun.* 9:3159.

340 Jarvis E.D., Mirarab S., Aberer A.J., Li B., Houde P., Li C., Ho S.Y.W., Faircloth B.C., Nabholz  
341 B., Howard J.T., Suh A., Weber C.C., da Fonseca R.R., Li J., Zhang F., Li H., Zhou L.,  
342 Narula N., Liu L., Ganapathy G., Boussau B., Bayzid M.S., Zavidovych V., Subramanian  
343 S., Gabaldon T., Capella-Gutierrez S., Huerta-Cepas J., Rekepalli B., Munch K., Schierup  
344 M., Lindow B., Warren W.C., Ray D., Green R.E., Bruford M.W., Zhan X., Dixon A., Li  
345 S., Li N., Huang Y., Derryberry E.P., Bertelsen M.F., Sheldon F.H., Brumfield R.T., Mello  
346 C. V., Lovell P. V., Wirthlin M., Schneider M.P.C., Prosdocimi F., Samaniego J.A.,  
347 Velazquez A.M. V., Alfaro-Nunez A., Campos P.F., Petersen B., Sicheritz-Ponten T., Pas  
348 A., Bailey T., Scofield P., Bunce M., Lambert D.M., Zhou Q., Perelman P., Driskell A.C.,  
349 Shapiro B., Xiong Z., Zeng Y., Liu S., Li Z., Liu B., Wu K., Xiao J., Yinqi X., Zheng Q.,  
350 Zhang Y., Yang H., Wang J., Smeds L., Rheindt F.E., Braun M., Fjeldsa J., Orlando L.,



351 Barker F.K., Jonsson K.A., Johnson W., Koepfli K.-P., O'Brien S., Haussler D., Ryder  
352 O.A., Rahbek C., Willerslev E., Graves G.R., Glenn T.C., McCormack J., Burt D., Ellegren  
353 H., Alstrom P., Edwards S. V., Stamatakis A., Mindell D.P., Cracraft J., Braun E.L.,  
354 Warnow T., Jun W., Gilbert M.T.P., Zhang G. 2014. Whole-genome analyses resolve early  
355 branches in the tree of life of modern birds. *Science*. 346:1320–1331.

356 Klopstein S., Massingham T., Goldman N. 2017. More on the best evolutionary rate for  
357 phylogenetic analysis. *Syst. Biol.* 66:769–785.

358 Kuang T., Tornabene L., Li J., Jiang J., Chakrabarty P., Sparks J.S., Naylor G.J.P., Li C. 2018.  
359 Phylogenomic analysis on the exceptionally diverse fish clade Gobioidae (Actinopterygii:  
360 Gobiiformes) and data-filtering based on molecular clocklikeness. *Mol. Phylogenet. Evol.*  
361 128:192–202.

362 Leaché A.D., Chavez A.S., Jones L.N., Grummer J.A., Gottscho A.D., Linkem C.W. 2015.  
363 Phylogenomics of phrynosomatid lizards: conflicting signals from sequence capture versus  
364 restriction site associated DNA sequencing. *Genome Biol. Evol.* 7:706–719.

365 Lemoine F., Domelevo Entfellner J.B., Wilkinson E., Correia D., Dávila Felipe M., De Oliveira  
366 T., Gascuel O. 2018. Renewing Felsenstein's phylogenetic bootstrap in the era of big data.  
367 *Nature*. 556:452–456.

368 Léveillé-Bourret É., Starr J.R., Ford B.A., Moriarty Lemmon E., Lemmon A.R. 2018. Resolving  
369 rapid radiations within angiosperm families using anchored phylogenomics. *Syst. Biol.*  
370 67:94–112.

371 Liu Y., Johnson M.G., Cox C.J., Medina R., Devos N., Vanderpoorten A., Hedenäs L., Bell N.E.,  
372 Shevock J.R., Aguero B., Quandt D., Wickett N.J., Shaw A.J., Goffinet B. 2019. Resolution  
373 of the ordinal phylogeny of mosses using targeted exons from organellar and nuclear

- 374 genomes. *Nat. Commun.* 10:1485.
- 375 Maddison W.P. 1997. Gene trees in species trees. *Syst. Biol.* 46:523–536.
- 376 Mai U., Mirarab S. 2018. TreeShrink: fast and accurate detection of outlier long branches in  
377 collections of phylogenetic trees. *BMC Genomics.* 19:272.
- 378 Martijn J., Vosseberg J., Guy L., Offre P., Ettema T.J.G. 2018. Deep mitochondrial origin  
379 outside the sampled alphaproteobacteria. *Nature.* 557:101–105.
- 380 McCormack J.E., Harvey M.G., Faircloth B.C., Crawford N.G., Glenn T.C., Brumfield R.T.  
381 2013. A phylogeny of birds based on over 1,500 loci collected by target enrichment and  
382 high-throughput sequencing. *PLOS One.* 8:e54848.
- 383 McPeck M. a. 2008. The ecological dynamics of clade diversification and community assembly.  
384 *Am. Nat.* 172:270–84.
- 385 Minh B.Q., Hahn M.W., Lanfear R. 2018. New methods to calculate concordance factors for  
386 phylogenomic datasets. *bioRxiv.*:487801.
- 387 Molloy E.K., Warnow T. 2018. To include or not to include: The impact of gene filtering on  
388 species tree estimation methods. *Syst. Biol.* 67:285–303.
- 389 Moyle R.G., Oliveros C.H., Andersen M.J., Hosner P.A., Benz B.W., Manthey J.D., Travers  
390 S.L., Brown R.M., Faircloth B.C. 2016. Tectonic collision and uplift of Wallacea triggered  
391 the global songbird radiation. *Nat. Commun.* 7:12709.
- 392 Nguyen L.-T., Schmidt H.A., von Haeseler A., Minh B.Q. 2015. IQ-TREE: A fast and effective  
393 stochastic algorithm for estimating maximum-likelihood phylogenies. *Mol. Biol. Evol.*  
394 32:268–274.
- 395 Penny D., Hendy M.D. 1985. The use of tree comparison metrics. *Syst. Zool.* 34:75–82.
- 396 Penny D., McComish B.J., Charleston M.A., Hendy M.D. 2001. Mathematical elegance with

- 397           biochemical realism: The covarion model of molecular evolution. *J. Mol. Evol.* 53:711–723.
- 398   Phillimore A.B., Price T.D. 2008. Density-dependent cladogenesis in birds. *PLOS Biol.* 6:e71.
- 399   Prebus M. 2017. Insights into the evolution, biogeography and natural history of the acorn ants,  
400           genus *Temnothorax* Mayr (hymenoptera: Formicidae). *BMC Evol. Biol.* 17:250.
- 401   Prum R.O., Berv J.S., Dornburg A., Field D.J., Townsend J.P., Lemmon E.M., Lemmon A.R.  
402           2015. A comprehensive phylogeny of birds (Aves) using targeted next-generation DNA  
403           sequencing. *Nature.* 526:569–573.
- 404   Pyron R.A., Hsieh F.W., Lemmon A.R., Lemmon E.M., Hendry C.R. 2016. Integrating  
405           phylogenomic and morphological data to assess candidate species-delimitation models in  
406           brown and red-bellied snakes (*Storeria*). *Zool. J. Linn. Soc.* 177:937–949.
- 407   Ran J.H., Shen T.T., Wang M.M., Wang X.Q. 2018. Phylogenomics resolves the deep phylogeny  
408           of seed plants and indicates partial convergent or homoplastic evolution between Gnetales  
409           and angiosperms. *Proc. R. Soc. B Biol. Sci.* 285:20181012.
- 410   Reddy S., Kimball R.T., Pandey A., Hosner P.A., Braun M.J., Hackett S.J., Han K.-L.,  
411           Harshman J., Huddleston C.J., Kingston S., Marks B.D., Miglia K.J., Moore W.S., Sheldon  
412           F.H., Witt C.C., Yuri T., Braun E.L. 2017. Why do phylogenomic data sets yield conflicting  
413           trees? Data type influences the avian Tree of Life more than taxon sampling. *Syst. Biol.*  
414           66:857–879.
- 415   Revell L., Harmon L., Glor R. 2005. Under-parameterized model of sequence evolution leads to  
416           bias in the estimation of diversification rates from molecular phylogenies. *Syst. Biol.*  
417           54:973–983.
- 418   Richards E.J., Brown J.M., Barley A.J., Chong R.A., Thomson R.C. 2018. Variation across  
419           mitochondrial gene trees provides evidence for systematic error: How much gene tree

- 420 variation Is biological? *Syst. Biol.* 67:847–860.
- 421 Richart C.H., Hayashi C.Y., Hedin M. 2016. Phylogenomic analyses resolve an ancient  
422 trichotomy at the base of Ischyropsalidoidea (Arachnida, Opiliones) despite high levels of  
423 gene tree conflict and unequal minority resolution frequencies. *Mol. Phylogenet. Evol.*  
424 95:171–182.
- 425 Robinson D.F., Foulds L.R. 1981. Comparison of phylogenetic trees. *Math. Biosci.* 53:131–147.
- 426 Sanderson M.J., Shaffer H.B. 2002. Troubleshooting molecular phylogenetic analyses. *Annu.*  
427 *Rev. Ecol. Syst.* 33:49–72.
- 428 Steel M., Leuenberger C. 2017. The optimal rate for resolving a near-polytomy in a phylogeny.  
429 *J. Theor. Biol.* 420:174–179.
- 430 Streicher J.W., Wiens J.J. 2017. Phylogenomic analyses of more than 4000 nuclear loci resolve  
431 the origin of snakes among lizard families. *Biol. Lett.* 13:20170393.
- 432 Su Z., Townsend J.P. 2015. Utility of characters evolving at diverse rates of evolution to resolve  
433 quartet trees with unequal branch lengths: analytical predictions of long-branch effects.  
434 *BMC Evol. Biol.* 15:86.
- 435 Sullivan J., Joyce P. 2005. Model selection in phylogenetics. *Annu. Rev. Ecol. Evol. Syst.*  
436 36:445–466.
- 437 Townsend J.P., Leuenberger C. 2011. Taxon sampling and the optimal rates of evolution for  
438 phylogenetic inference. *Syst. Biol.* 60:358–365.
- 439 Wiens J.J., Hutter C.R., Mulcahy D.G., Noonan B.P., Townsend T.M., Sites J.W., Reeder T.W.  
440 2012. Resolving the phylogeny of lizards and snakes (Squamata) with extensive sampling  
441 of genes and species. *Biol. Lett.* 8:1043–1046.
- 442 Wilkinson M. 1996. Majority-rule reduced consensus trees and their use in bootstrapping. *Mol.*

- 443 Biol. Evol. 13:437–444.
- 444 Wolfe J.M., Breinholt J.W., Crandall K.A., Lemmon A.R., Lemmon E.M., Timm L.E., Siddall  
445 M.E., Bracken-Grissom H.D. 2019. A phylogenomic framework, evolutionary timeline and  
446 genomic resources for comparative studies of decapod crustaceans. *Proc. R. Soc. B Biol.*  
447 *Sci.* 286:20190079.
- 448 Xia X., Xie Z., Salemi M., Chen L., Wang Y. 2003. An index of substitution saturation and its  
449 application. *Mol. Phylogenet. Evol.* 26:1–7.
- 450 Yang Z. 1998. On the best evolutionary rate for phylogenetic analysis. *Syst. Biol.* 47:125–133.
- 451 Zhang C., Rabiee M., Sayyari E., Mirarab S. 2018. ASTRAL-III: polynomial time species tree  
452 reconstruction from partially resolved gene trees. *BMC Bioinformatics.* 19:153.
- 453 Zheng Y., Wiens J.J. 2016. Combining phylogenomic and supermatrix approaches, and a time-  
454 calibrated phylogeny for squamate reptiles (lizards and snakes) based on 52 genes and 4162  
455 species. *Mol. Phylogenet. Evol.* 94:537–547.
- 456

457 **Table 1.** Phylogenomic data sets for which the association between phylogenetic signal and  
 458 branch characteristics was tested. The treatment of data sets was similar to that in the original  
 459 studies. Some of the published alignments were excluded because of numerical problems in  
 460 phylogenetics software, excessive missing data, or file-format difficulties (such as those caused  
 461 by unusual characters).  
 462

| Taxon                                             | Number of genes | Number of taxa per gene | Data type/genomic region | Source                       |
|---------------------------------------------------|-----------------|-------------------------|--------------------------|------------------------------|
| Stinging wasps (Aculeata)                         | 807             | 140–183                 | UCE                      | Branstetter et al. 2017      |
| Laurasiatherian mammals (Laurasiatheria)          | 10,258          | 8–23                    | Intron                   | Chen et al. 2017 (a)         |
| Laurasiatherian mammals (Laurasiatheria)          | 3637            | 5–23                    | Intron                   | Chen et al. 2017 (b)         |
| Amniote vertebrates (Amniota)                     | 1145            | 10                      | UCE                      | Crawford et al. 2012         |
| Marsupial mammals (Marsupialia)                   | 1494            | 38–45                   | Exon                     | Duchêne et al. 2018a         |
| Butterflies (Papilionoidea)                       | 350             | 144–205                 | Exon                     | Espeland et al. 2018         |
| Ray-finned fishes (Actinopterygii)                | 489             | 5–27                    | UCE                      | Faircloth et al. 2013        |
| North American tarantulas ( <i>Aphonopelma</i> )  | 581             | 63–83                   | Anchor                   | Hamilton et al. 2016 (a)     |
| Spiders (Araneae)                                 | 326             | 22–34                   | Anchor                   | Hamilton et al. 2016 (b)     |
| North American mygalomorph spiders (Euctenizidae) | 403             | 18–25                   | Anchor                   | Hamilton et al. 2016 (c)     |
| Ray-finned fishes (Actinopterygii)                | 1101            | 105–298                 | Exon                     | Hughes et al. 2018           |
| Cichlid fishes (Cichlidae)                        | 533             | 57–149                  | Anchor                   | Irisarri et al. 2018         |
| Birds (Aves)                                      | 8293            | 42–52                   | Exon                     | Jarvis et al. 2014 (a)       |
| Birds (Aves)                                      | 8287            | 42–52                   | Exon                     | Jarvis et al. 2014 (b)       |
| Birds (Aves)                                      | 2515            | 39–52                   | Intron                   | Jarvis et al. 2014 (c)       |
| Gobioid fishes (Actinopterygii: Gobioidei)        | 570             | 43                      | Exon                     | Kuang et al. 2018            |
| Iguanas (Phrynosomatidae)                         | 580             | 4–11                    | UCE                      | Leaché et al. 2015           |
| Flowering plants (Angiospermae)                   | 370             | 29–35                   | Anchor                   | Léveillé-Bourret et al. 2018 |
| Mosses (Bryophyta)                                | 105             | 68–146                  | Exon                     | Liu et al. 2019              |
| Birds (Neoaves)                                   | 1539            | 17–33                   | UCE                      | McCormack et al. 2013        |
| Songbirds (Passeri)                               | 515             | 106                     | UCE                      | Moyle et al. 2016            |
| Acorn ants ( <i>Temnothorax</i> )                 | 2091            | 44–50                   | UCE                      | Prebus 2017                  |
| Birds (Aves)                                      | 259             | 164–200                 | Anchor                   | Prum et al. 2015             |

|                                         |      |         |        |                          |
|-----------------------------------------|------|---------|--------|--------------------------|
| Snakes ( <i>Storeria</i> )              | 322  | 70–90   | Anchor | Pyron et al. 2016        |
| Gymnosperms (Gymnospermae)              | 1308 | 38      | Exon   | Ran et al. 2018 (a)      |
| Gymnosperms (Gymnospermae)              | 1308 | 38      | Exon   | Ran et al. 2018 (b)      |
| Gymnosperms (Gymnospermae)              | 1308 | 38      | Exon   | Ran et al. 2018 (c)      |
| Harvestmen spiders (Ischiropsalidoidea) | 672  | 5       | Exon   | Richart et al. 2016 (a)  |
| Harvestmen spiders (Ischiropsalidoidea) | 653  | 5       | Exon   | Richart et al. 2016 (b)  |
| Harvestmen spiders (Ischiropsalidoidea) | 672  | 5       | Exon   | Richart et al. 2016 (c)  |
| Squamate reptiles (Squamata)            | 4175 | 18–34   | UCE    | Streicher and Wiens 2017 |
| Squamate reptiles (Squamata)            | 44   | 98–167  | Exon   | Wiens et al. 2012        |
| Decapod crustaceans (Decapoda)          | 105  | 57–94   | Exon   | Wolfe et al. 2019        |
| Squamate reptiles (Squamata)            | 52   | 98–2378 | Anchor | Zheng and Wiens 2016     |

463

464 **Supplementary Figure S1.** Summary *t*-statistic for multiple regression tests of the association  
 465 between five explanatory variables describing branch lengths and each of two response variables:  
 466 (a, c) topological distance between gene trees and the inferred species tree; and (b, d) mean  
 467 distance from each gene tree to all other gene trees. Rows of panels indicate the results of  
 468 analyses where regression samples (genes) were weighted by the number of branches (a, b) and  
 469 number of taxa (c, d) in respective studies. The legend lists the studies in ascending order of  
 470 number of genes in the data set (see Table 1 for details).  
 471

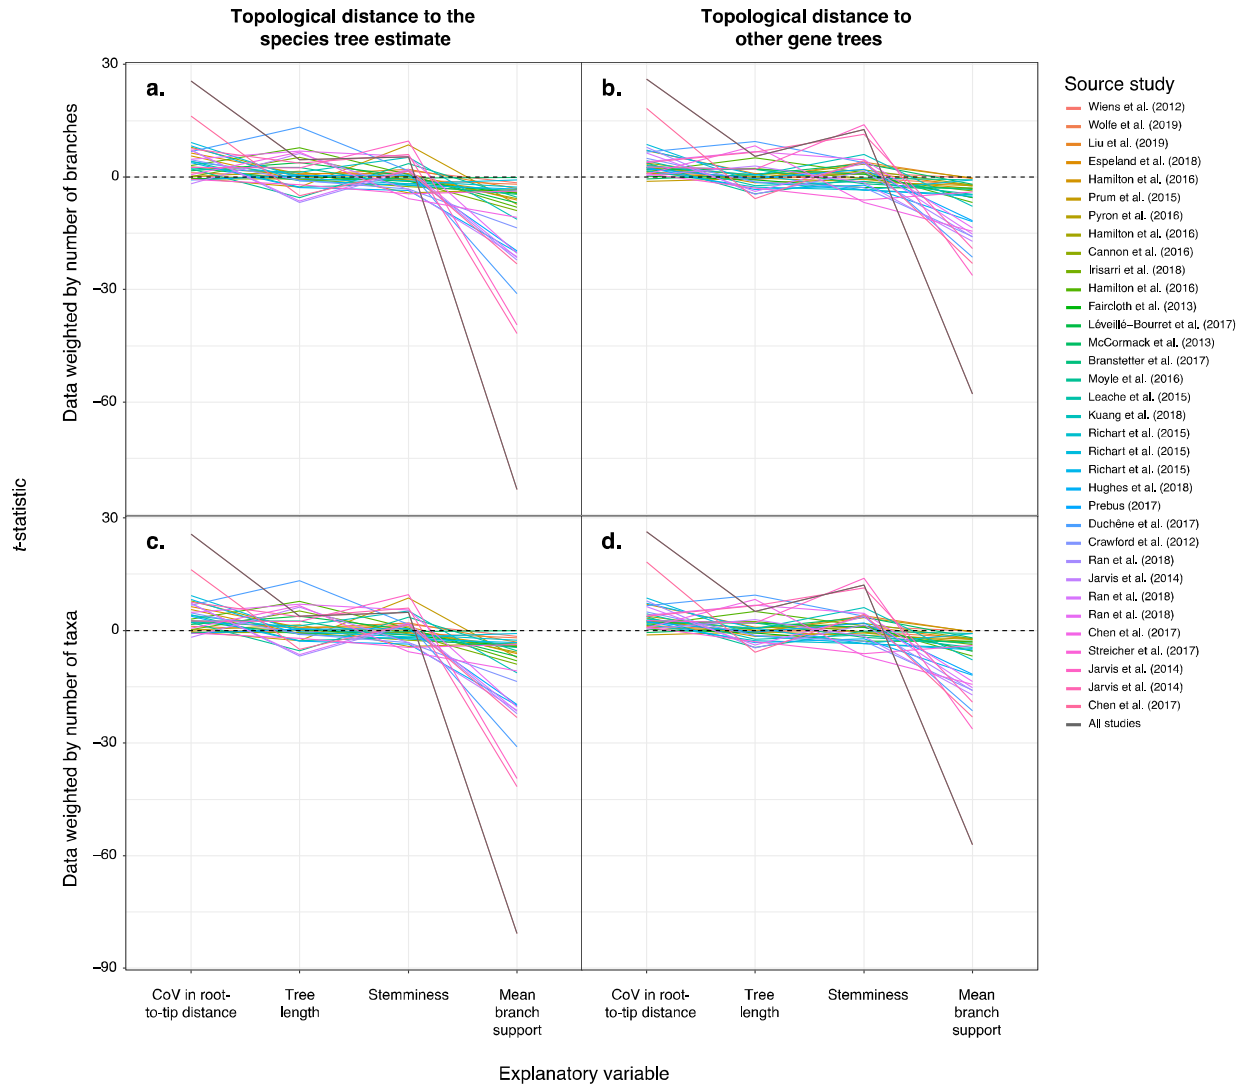

472  
 473



474 **Supplementary Figure S2.** Relationship between results of multiple regression models in which the response variable was the  
 475 distance to the estimated species tree (y-axis) and the mean distance to other gene trees (x-axis). Panels (a-e) show the association for  
 476 each of the five explanatory regression terms included. The black point indicates the results of the regression model that included the  
 477 complete data set with the source study of each genes included as a random factor. Studies in the legend are shown in ascending order  
 478 of number of genes included.  
 479

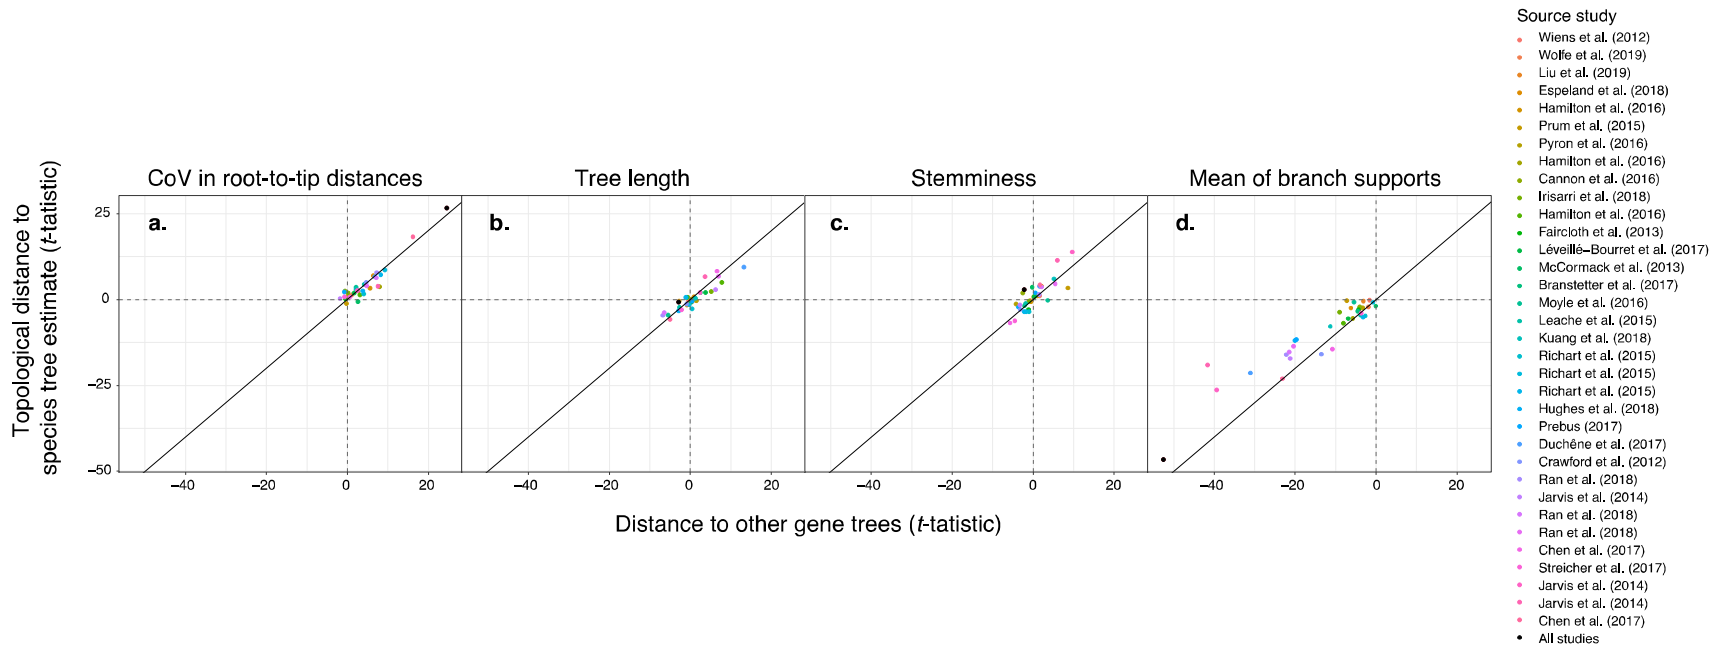

480
